# Supplementary figures and images for: A homoleptic phosphine adduct of Tl(I).
Source: Royal Society of Chemistry journal article supplement (doi:10.1039/b104447h), 2001-09-27

$^{205}\text{Tl}$  NMR, 231.31 MHz

$[\text{PhBP}_3]\text{Tl}$  in  $\text{C}_6\text{D}_6$

$\square = 2810$ ,  $^1J_{\text{TlP}} = 5204 \pm 116$  Hz

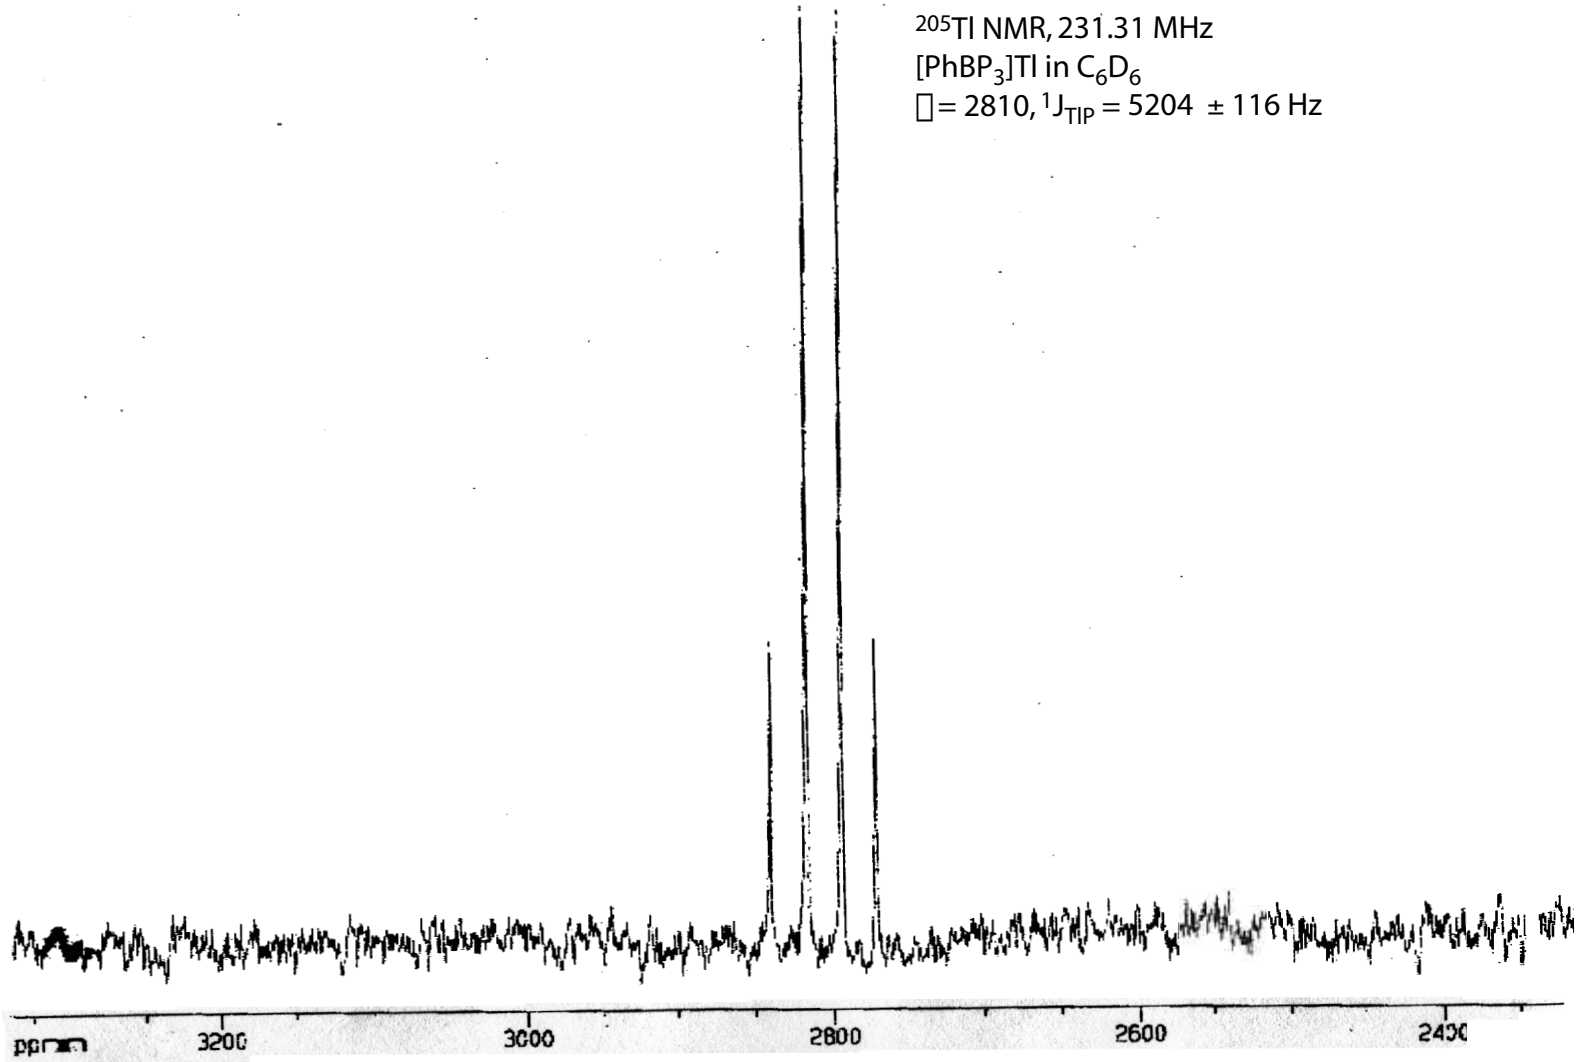

Supplement: b104447h2.pdf [file b104447h2.pdf]
